# Supplementary material for: Enhanced emission of organic and polymeric luminogens containing 2,4,6-triphenylpyridine moieties: crystallization- and aggregation-enhanced emission
Source: Royal Society of Chemistry journal article supplement (doi:10.1039/c3tc00851g), 2013-01-01
Supplement: c3tc00851g.pdf [file c3tc00851g.pdf]

Electronic Supplementary Information (ESI) for

**Enhanced Emissions of Organic and Polymeric Luminogens Containing  
2,4,6-Triphenylpyridine Moiety: Crystallization- and  
Aggregation-Enhanced Emission**

Chih-Min Yang, I-Wei Lee, Tai-Lin Chen, Wei-Lun Chien and Jin-Long Hong\*

*Department of Materials and Optoelectrical Science, National Sun Yat-Sen*

*University, Kaohsiung, 80424, Taiwan. E-mail: jlhong@mail.nsysu.edu.tw; Fax:*

*+886 07 5254099; Tel: +886 07 5252000 ext 4065*

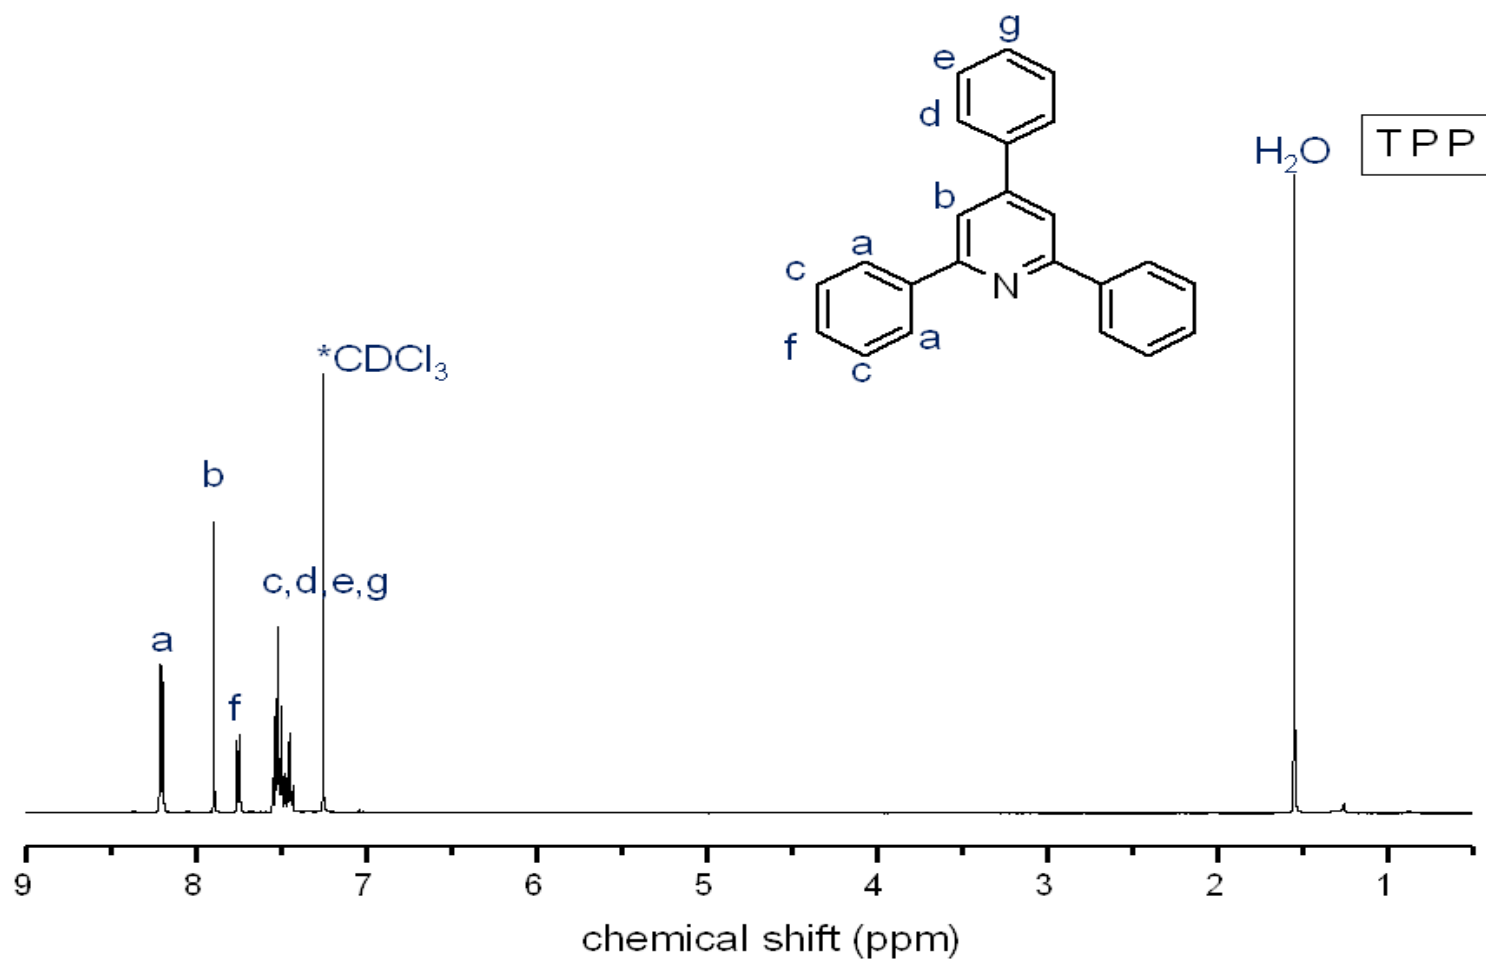

**Fig. S1**  $^1\text{H}$  NMR of TPP( $\text{CDCl}_3$ ).

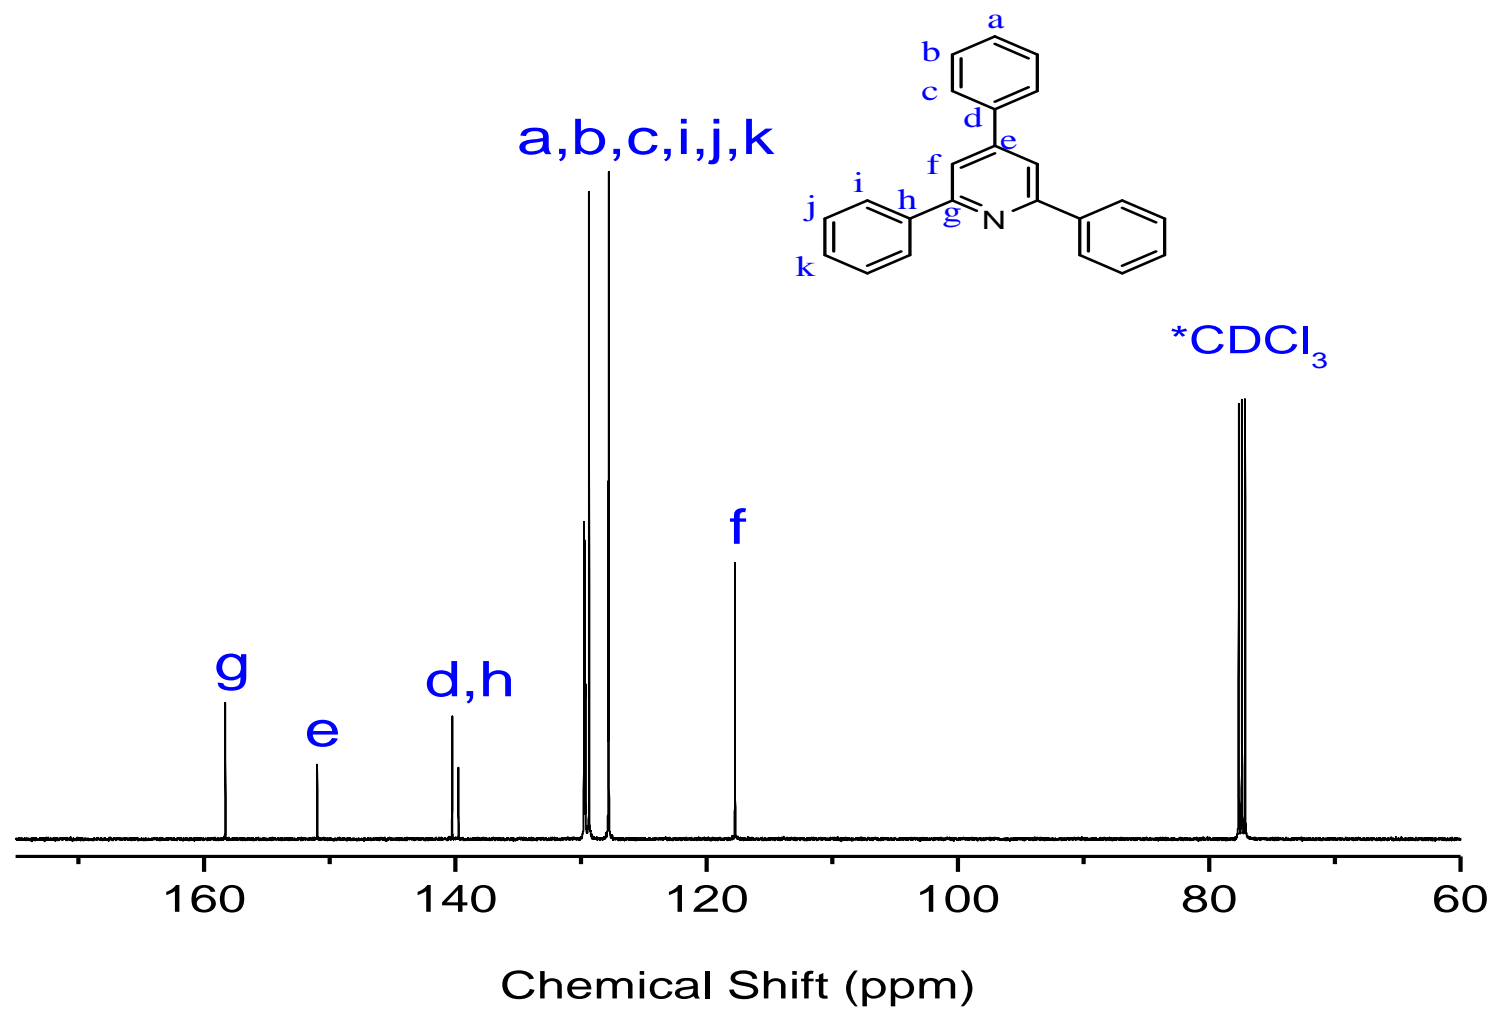

**Fig. S2**  $^{13}\text{C}$  NMR of TPP( $\text{CDCl}_3$ ).

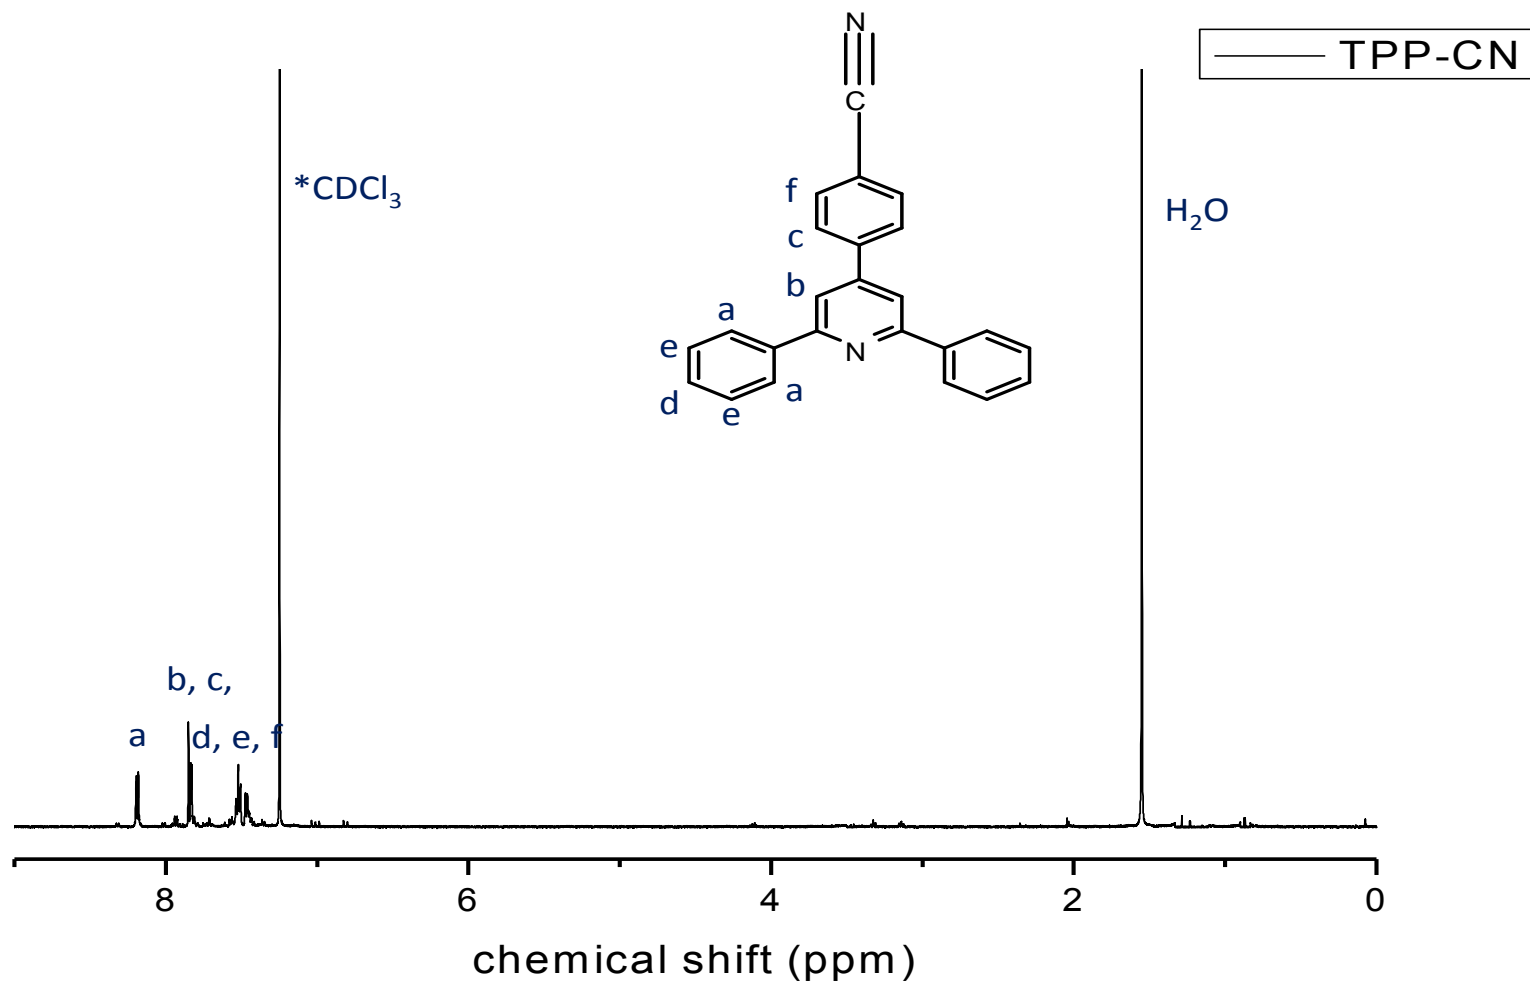

**Fig. S3**  $^1\text{H}$  NMR spectrum of TPP-CN( $\text{CDCl}_3$ ).

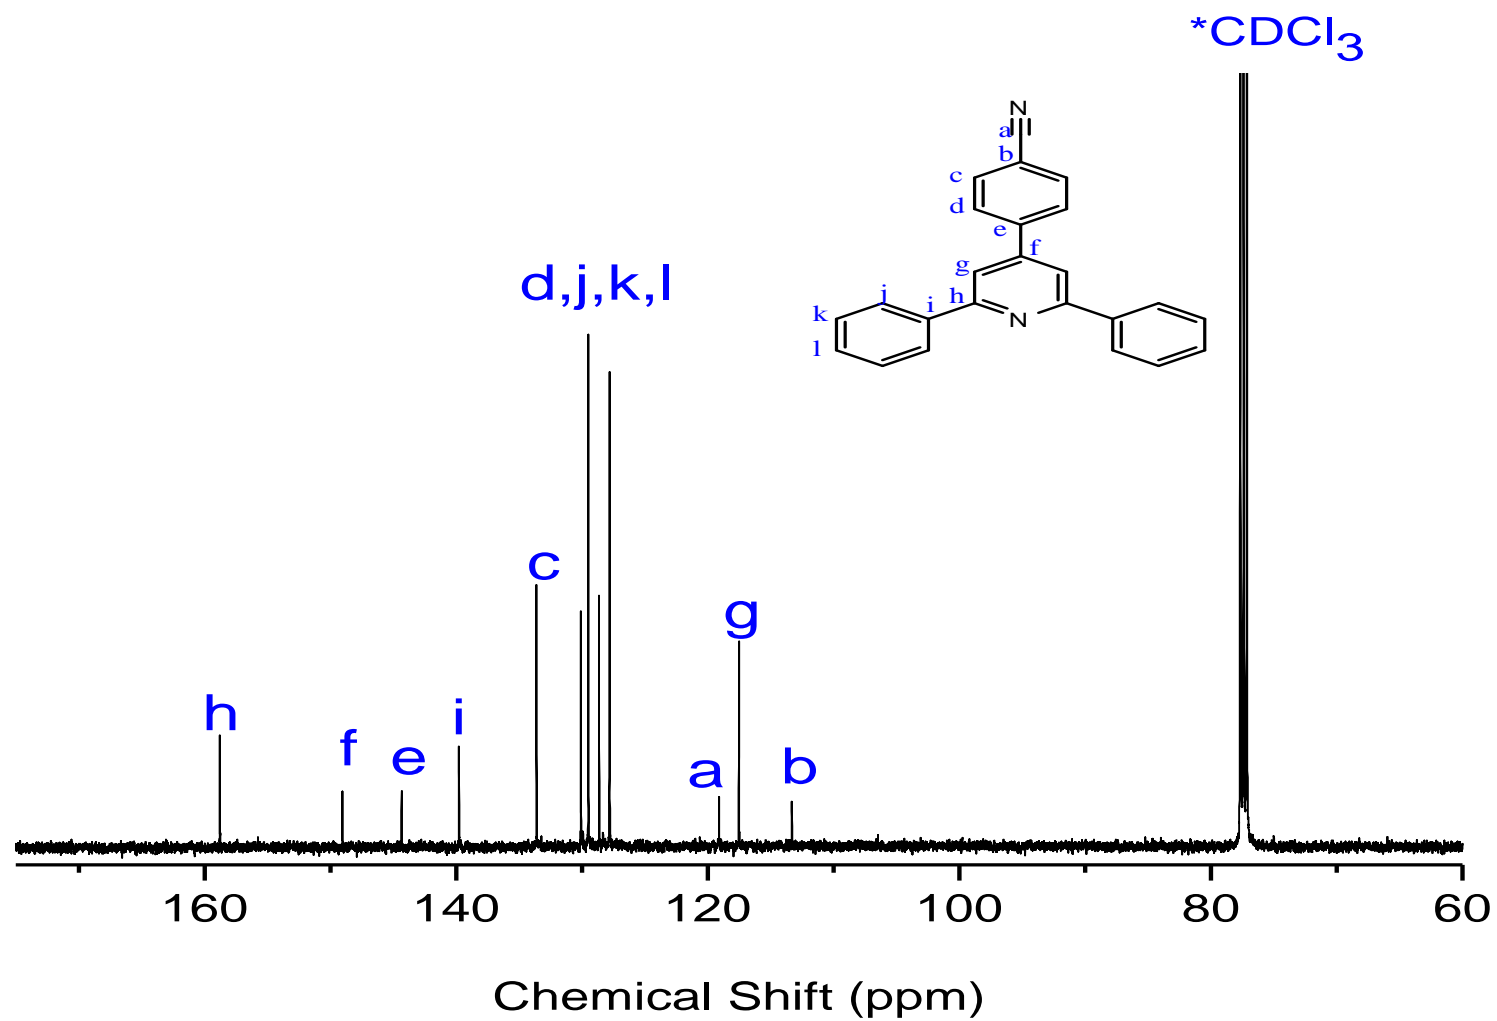

Fig. S4  $^{13}\text{C}$  NMR of TPP-CN( $\text{CDCl}_3$ ).

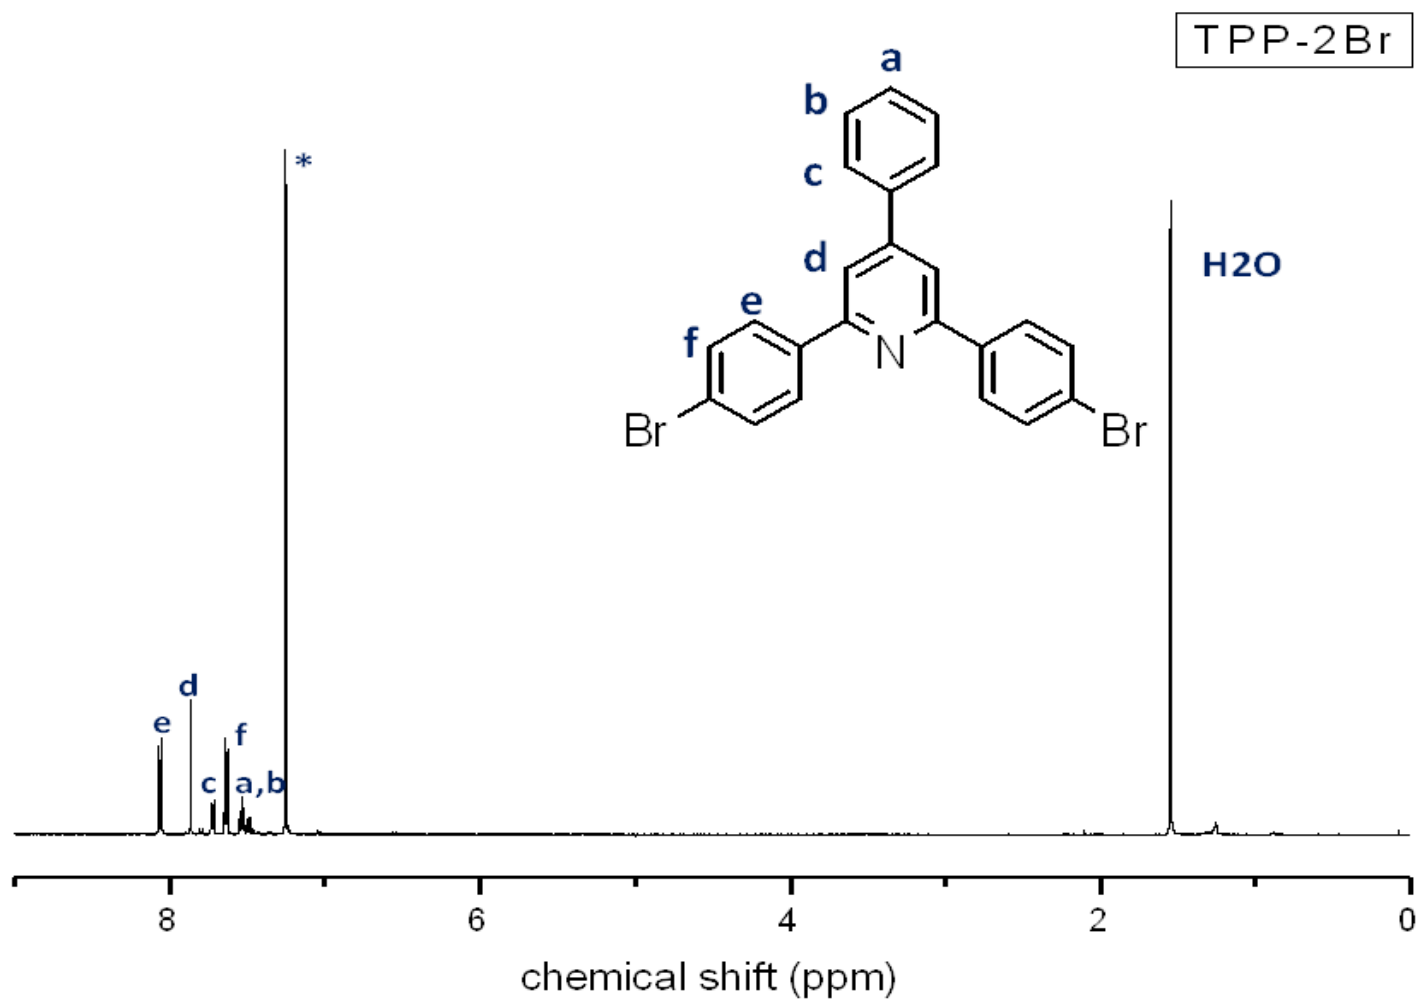

**Fig. S5**  $^1\text{H-NMR}$  spectrum of TPP-2Br( $\text{CDCl}_3$ ).

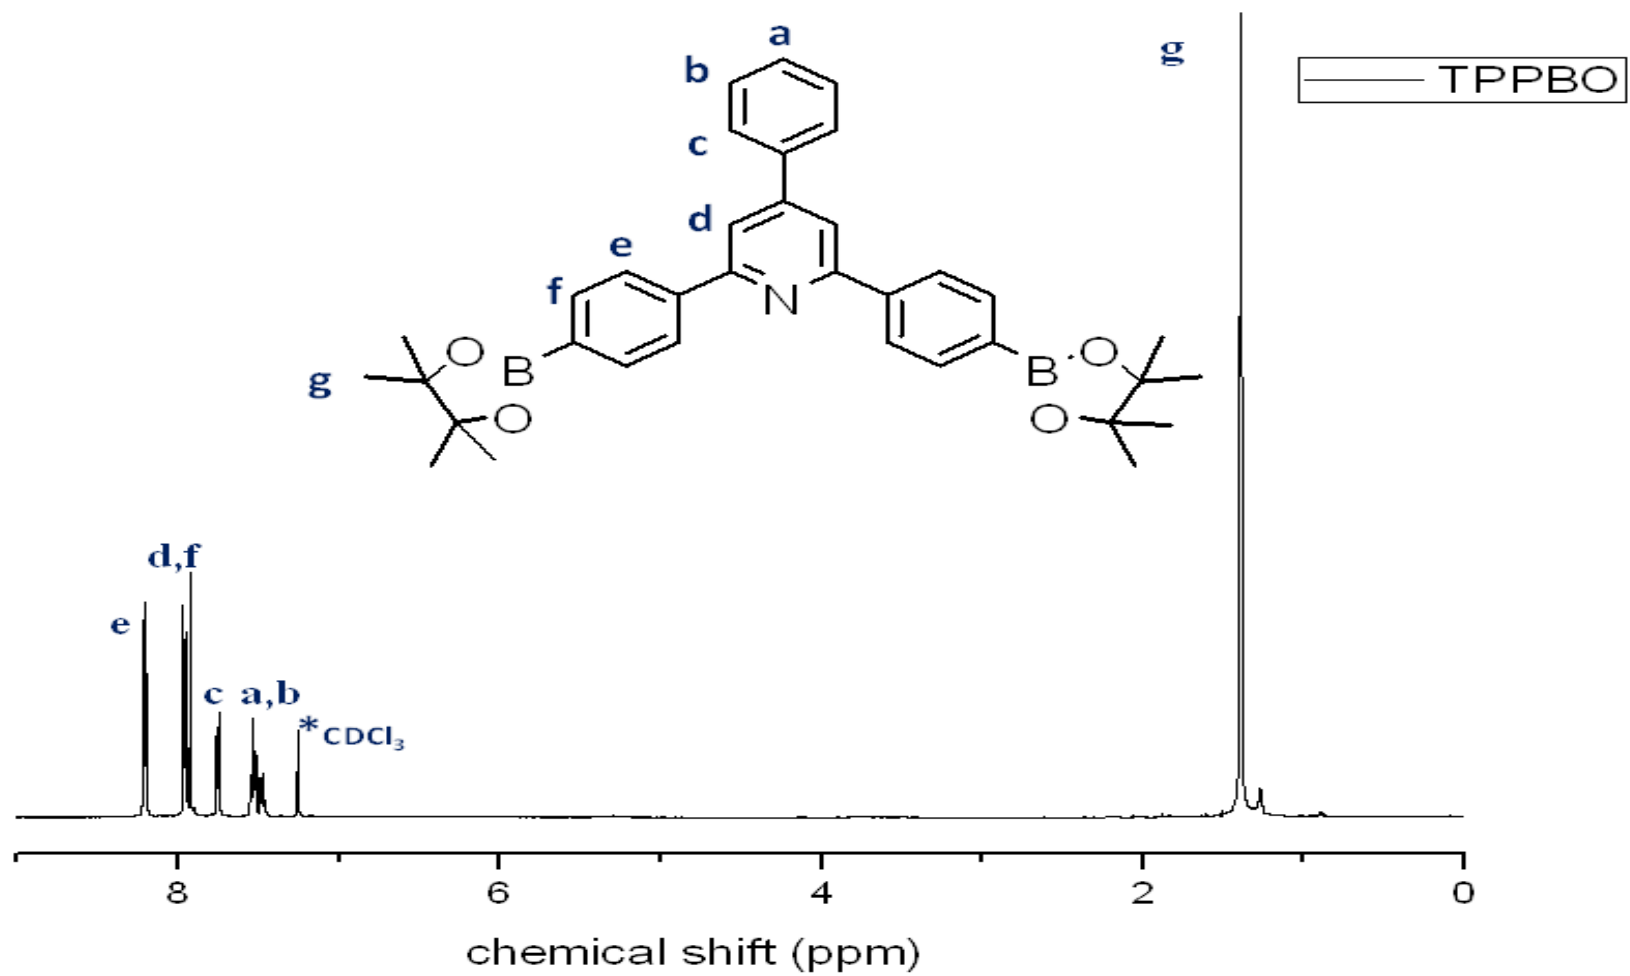

**Fig. S6** <sup>1</sup>H-NMR spectrum of TPPBO(CDCl<sub>3</sub>).

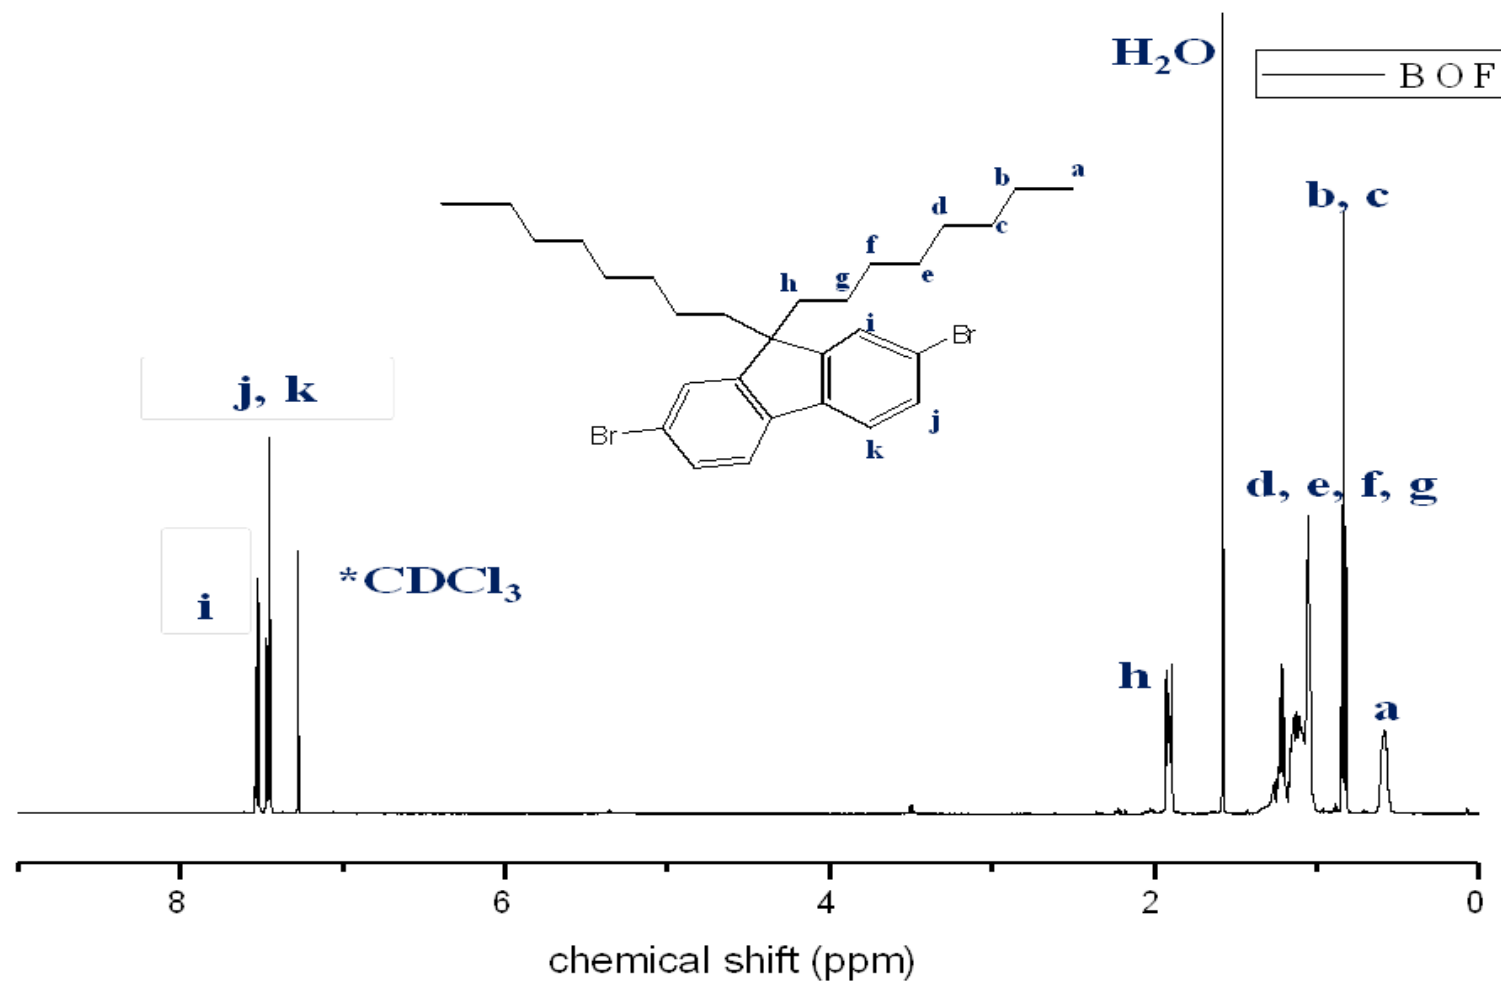

**Fig. S7**  $^1\text{H-NMR}$  spectrum of DOF ( $\text{CDCl}_3$ ).



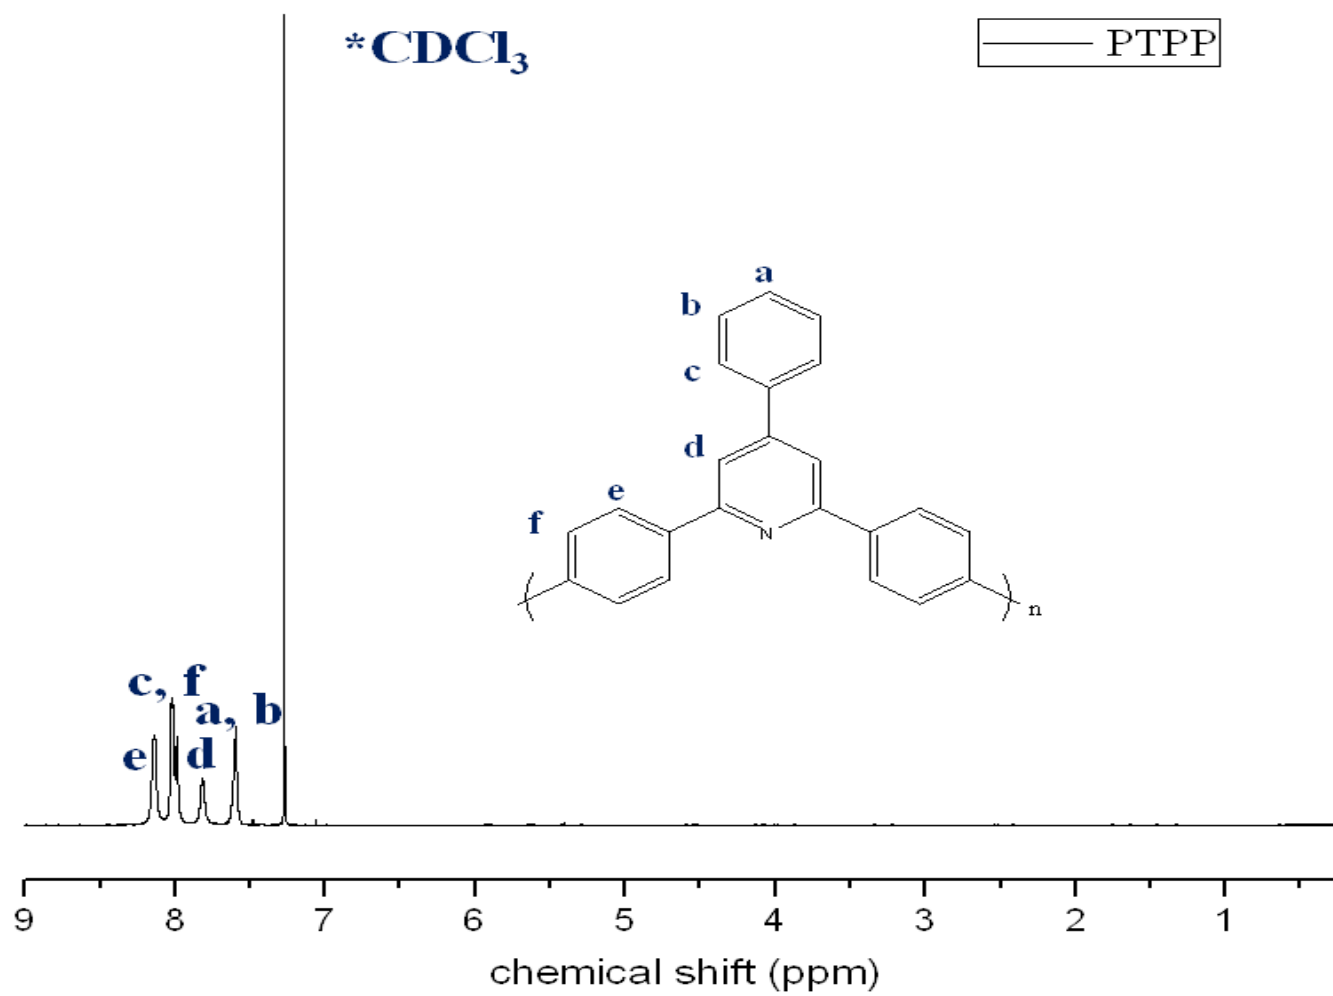

**Fig. S8**  $^1\text{H-NMR}$  spectrum of PTPP( $\text{CDCl}_3$ ).

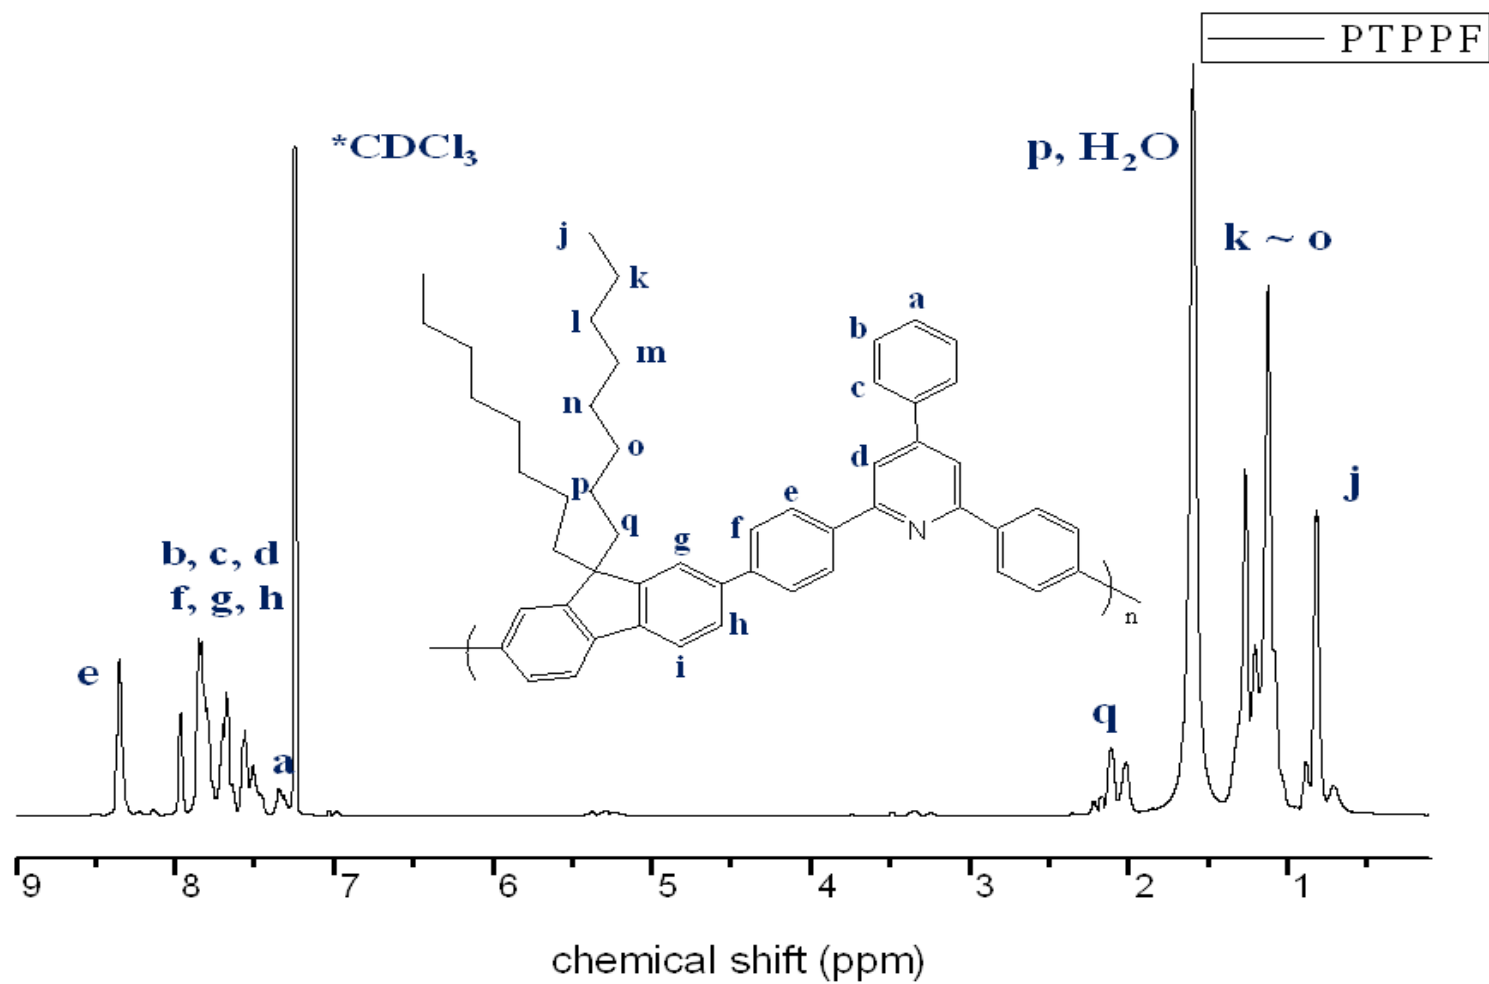

**Fig. S9**  $^1\text{H-NMR}$  spectrum of PTPPF( $\text{CDCl}_3$ ).

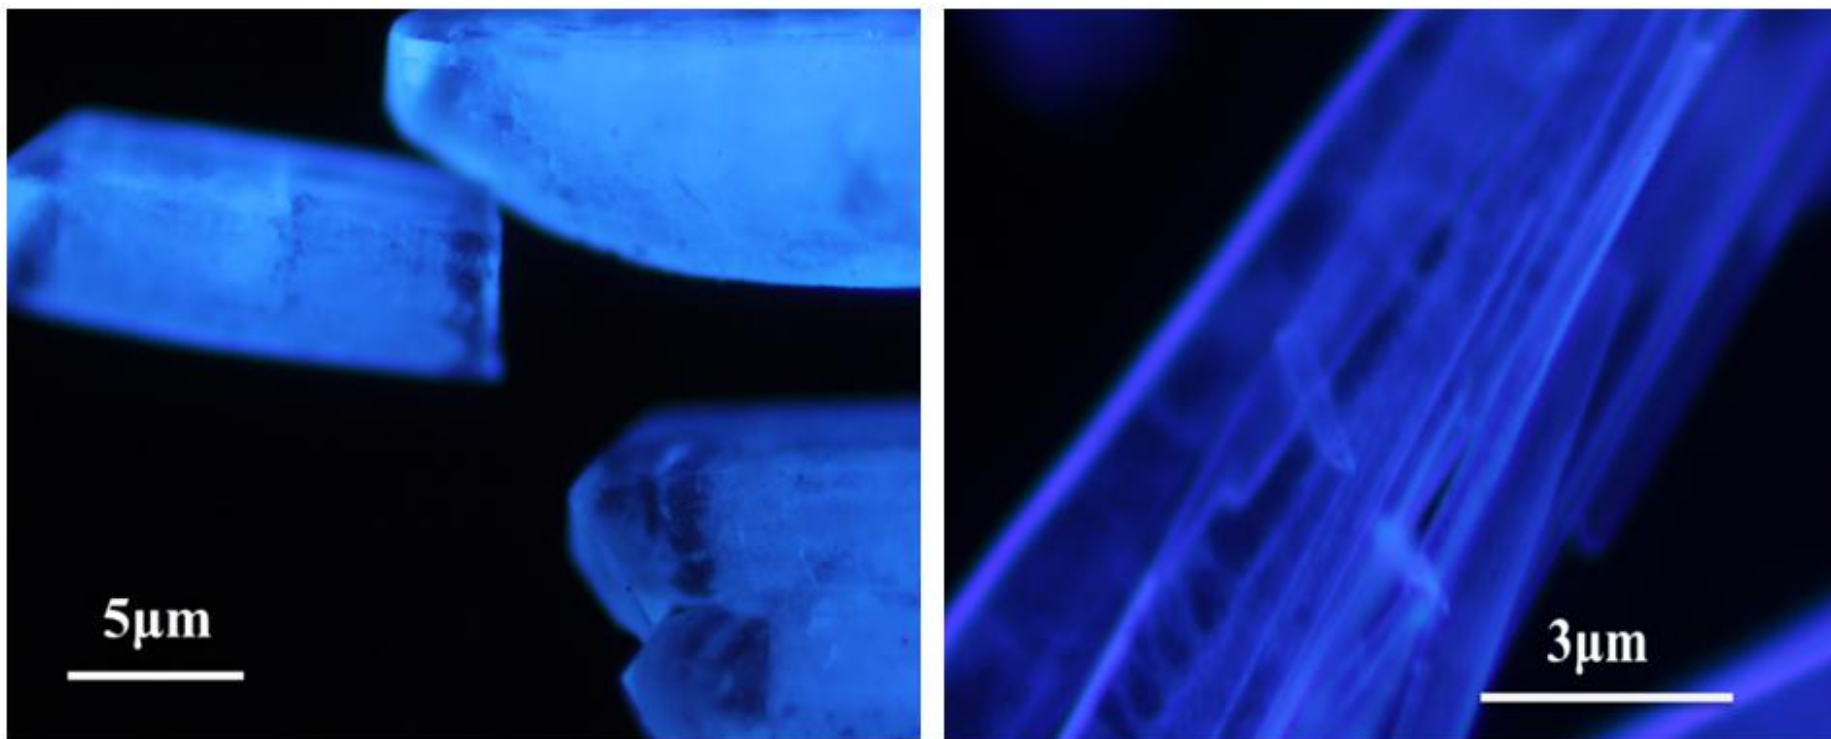

**Fig. S10** Fluorescent images of TPP (left) and TPP-CN (right) obtained by slow evaporations from the THF/hexane solutions.

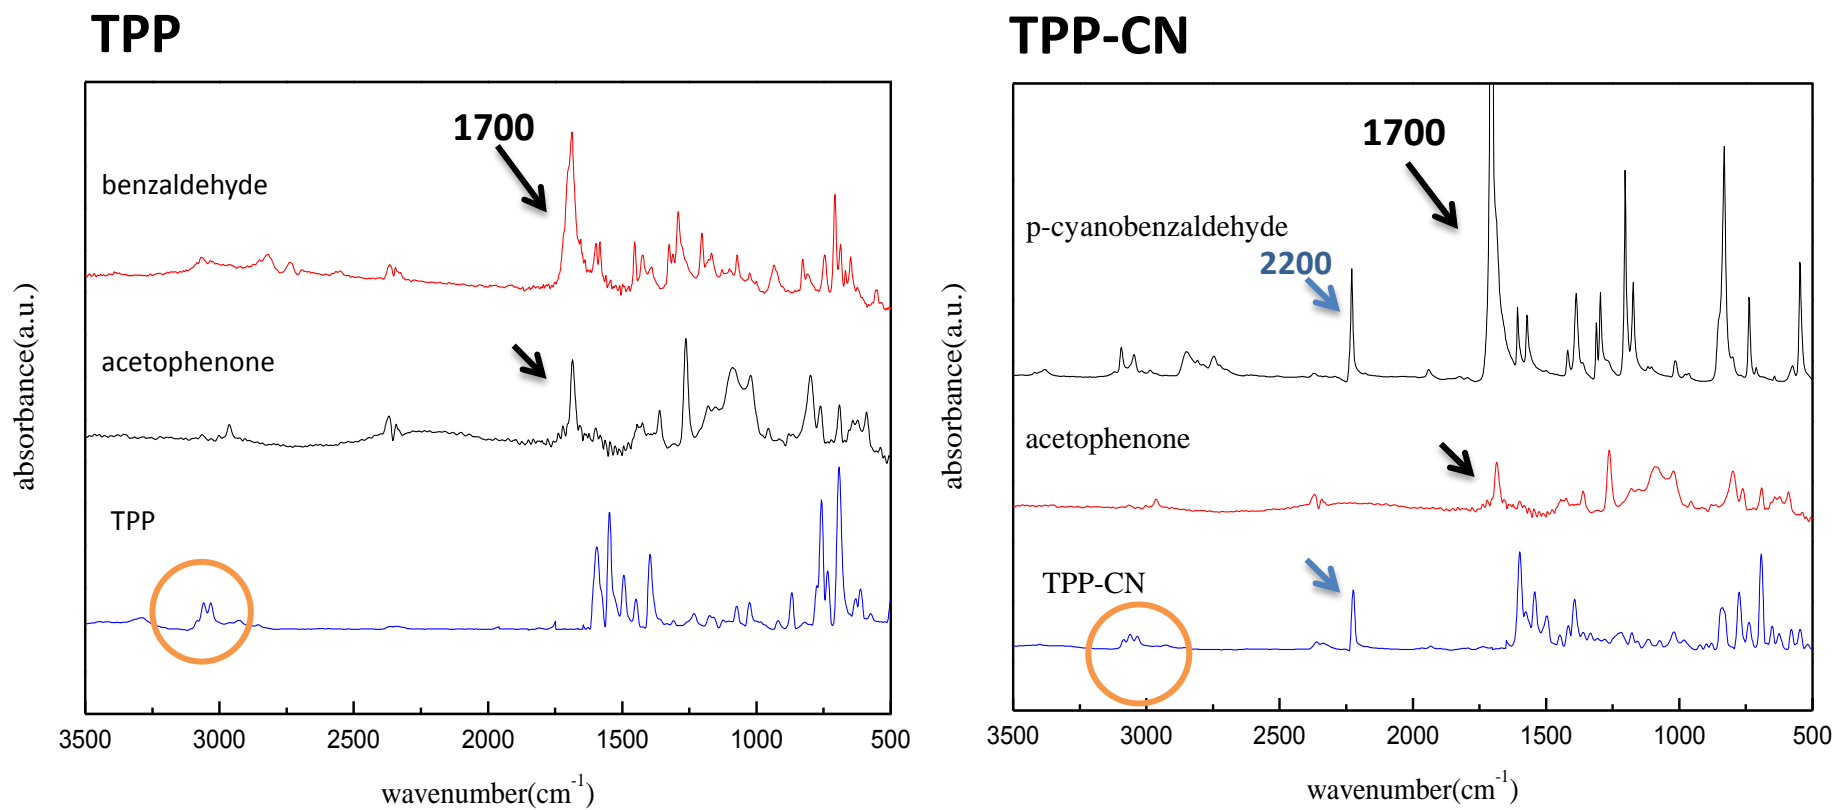

**Fig. S11** FT-IR spectra of TPP and TPP-CN.

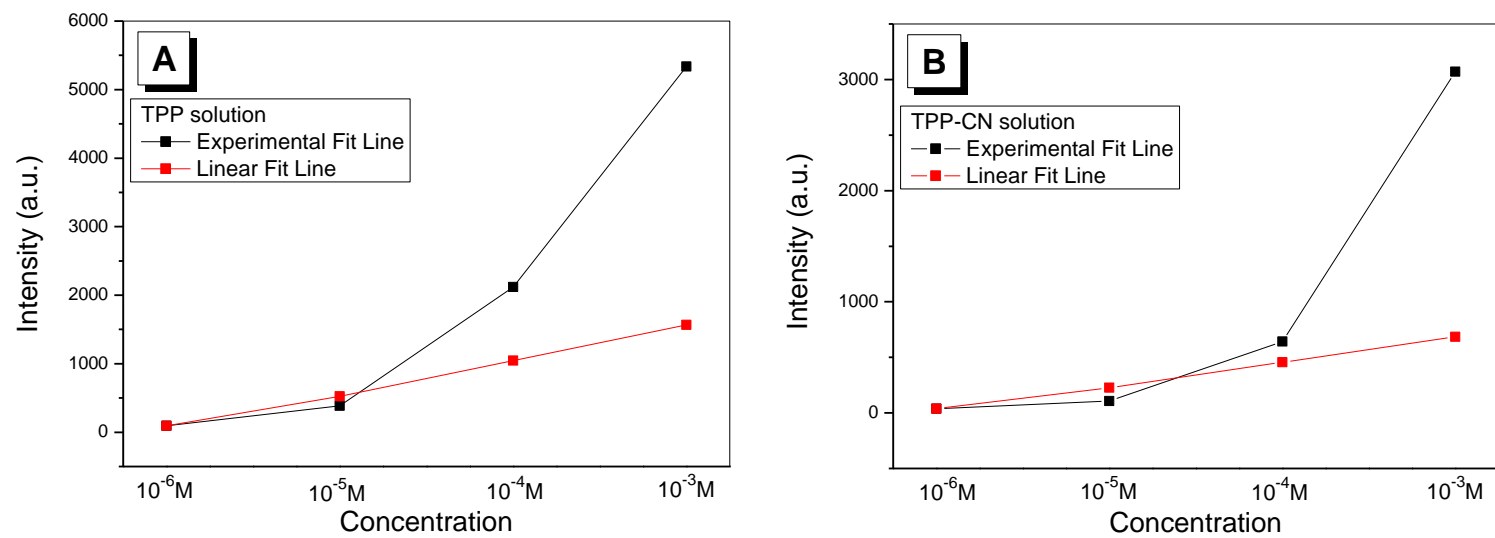

**Fig. S12** The intensity-concentration curves spectra of (A) TPP and (B) TPP-CN.

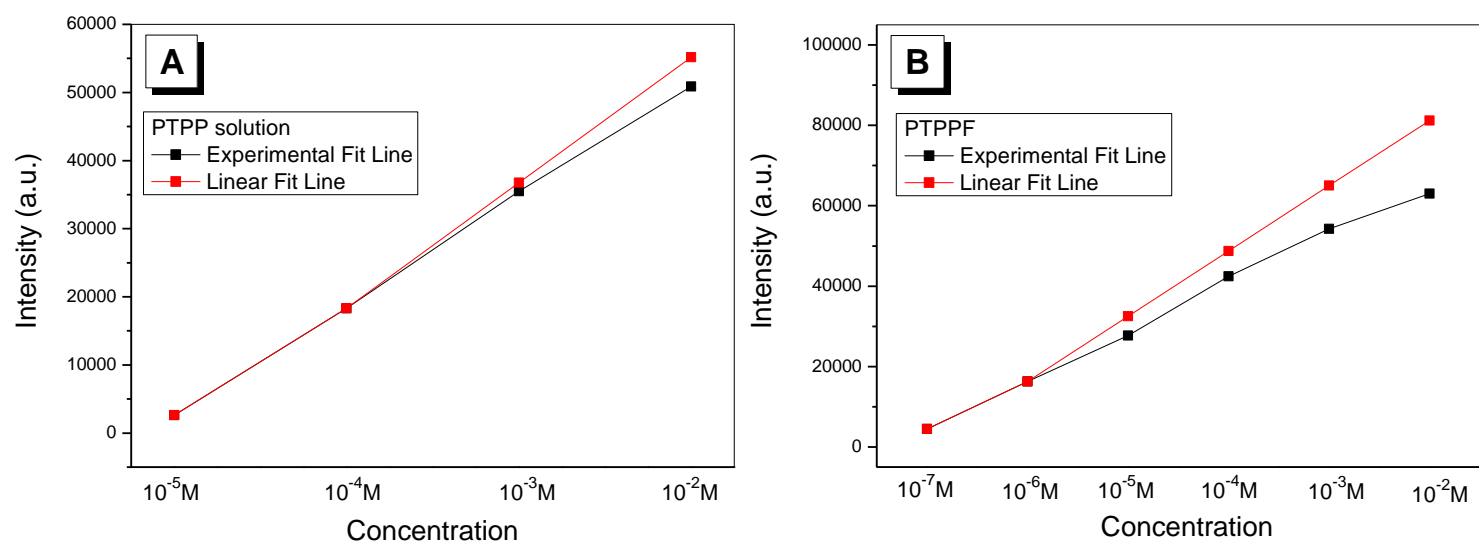

**Fig. S13** The intensity-concentration curves spectra of (A) PTPP and (B) PTPPF.
